# Supplementary material for: All-Trans Retinoic Acid Induces Proliferation, Survival, and Migration in A549 Lung Cancer Cells by Activating the ERK Signaling Pathway through a Transcription-Independent Mechanism
Source: Hindawi journal article supplement (doi:10.1155/2015/404368), 2015-01-01
Supplement: f1 [file 404368.f1.pdf]

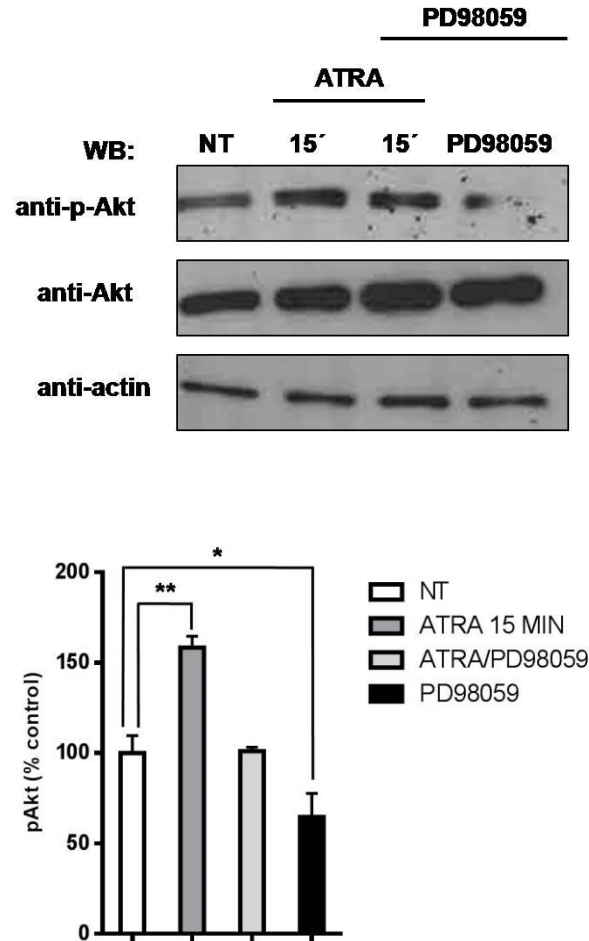

FIGURE S1. Effect of PD98059 inhibitor on ATRA-induced Akt activation. A549 cells were serum-starved for 18 h, treated or non-treated (NT) with 5  $\mu$ M of ATRA for 15 minutes. Cells were preincubated for 90 minutes with 25  $\mu$ M of PD98059 alone or in combination with ATRA. The phosphorylated form of Akt and total proteins were detected by western blot using specific antibodies.  $\beta$ -Actin was used as the loading control. The graph represents the densitometric values of Akt phosphorylation in three independent experiments (means  $\pm$  SEM, \* $p$  < 0.05; \*\* $p$  < 0.001 compared with NT cells, analysis of variance and Newman-Keuls test).
